# Telephone Consultation Cannot Replace Bedside Infectious Disease Consultation in the Management of *Staphylococcus aureus* Bacteremia

E. Forsblom,<sup>1</sup> E. Ruotsalainen,<sup>1</sup> J. Ollgren,<sup>2</sup> and A. Järvinen<sup>1</sup>

<sup>1</sup>Division of Infectious Diseases, Department of Medicine, Helsinki University Central Hospital, and <sup>2</sup>National Institute for Health and Welfare, Helsinki, Finland

(See the Editorial Commentary by Chu and Sexton on pages 536–8.)

**Background.** Infectious disease specialist (IDS) consultation improves the outcome of *Staphylococcus aureus* bacteremia (SAB). Although telephone consultations constitute a substantial part of IDS consultations, their impact on treatment outcome lacks evaluation.

**Methods.** We retrospectively followed 342 SAB episodes with 90-day follow-up, excluding 5 methicillin-resistant *S. aureus* SAB cases. Patients were grouped according to bedside, telephone, or no IDS consultation within the first week. Patients with fatal outcome within 3 days after onset of SAB were excluded to allow for the possibility of death occurring before IDS consultation.

**Results.** Seventy-two percent of patients received bedside, 18% telephone, and 10% no IDS consultation. Patients with bedside consultation were less often treated in an intensive care unit during the first 3 days compared to those with telephone consultation (odds ratio [OR], 0.53; 95% confidence interval [CI], .29–.97;  $P = .037$ ; 21% vs 34%), with no other initial differences between these groups. Patients with bedside consultation more often had deep infection foci localized as compared to patients with telephone consultation (OR, 3.11; 95% CI, 1.74–5.57;  $P < .0001$ ; 78% vs 53%). Patients with bedside consultation had lower mortality than patients with telephone consultation at 7 days (OR, 0.09; 95% CI, .02–.49;  $P = .001$ ; 1% vs 8%), at 28 days (OR, 0.27; 95% CI, .11–.65;  $P = .002$ ; 5% vs 16%) and at 90 days (OR, 0.25; 95% CI, .13–.51;  $P < .0001$ ; 9% vs 29%). Considering all prognostic markers, 90-day mortality for telephone-consultation patients was higher (OR, 2.31; CI, 95% 1.22–4.38;  $P = .01$ ) as compared to bedside consultation.

**Conclusions.** Telephone IDS consultation is inferior to bedside IDS consultation.

**Keywords.** *Staphylococcus aureus* bacteraemia; infectious disease specialist consultation; deep infection foci.

*Staphylococcus aureus* bacteremia (SAB) carries a high overall mortality rate, reported to be 7%–39% [1–3]. For SAB, infectious disease specialist (IDS) consultation provides the best evidence of improved treatment

results [4–9]. Consultation by IDS is known to enhance proper antibiotic selection [4–7, 10, 11], alter therapy duration [4, 6, 8, 9], and improve outcome in bacteremia and endocarditis [1, 4–11]. Adherence to IDS recommendations from the treating physician have been shown to be of pivotal importance for disease progression and outcome [1, 10, 11]. However, the content of the IDS consultation has been defined only in a few studies [1, 8, 9] where it comprised a clinical examination, follow-up visit, and written recommendations or recommendations provided directly to the attending physician regarding appropriate SAB management [1, 9]. Only 2 studies have stated whether the IDS consultation

Received 22 May 2012; accepted 28 August 2012; electronically published 19 October 2012.

Correspondence: Erik Forsblom, MD, Division of Infectious Diseases, Helsinki University Central Hospital, Nordenskiöldinkatu 20, Rak. 5, A, 1, Helsinki PL 348, 00029 HUS, Helsinki, Finland (erik.forsblom@helsinki.fi).

**Clinical Infectious Diseases** 2013;56(4):527–35

© The Author 2012. Published by Oxford University Press on behalf of the Infectious Diseases Society of America. All rights reserved. For Permissions, please e-mail: journals.permissions@oup.com.

DOI: 10.1093/cid/cis889

was formal or informal [1, 7]. Otherwise, the formality of the IDS consultation goes unmentioned [1, 4–6, 8, 9].

An integral part of ever-deepening specialization in clinical medicine today involves informal consultations [12–16]. In these consultations, a specialist provides information, for instance, via telephone or what is called informal or curbside conversation, on disease management without meeting the patient [12]. Infectious disease specialists are among the physicians most often consulted by other specialists and general practitioners. Many of these consultations are informal [12–16], and these types of consultations may be even more frequent than formal ones [12]. Most informal consultations involving IDS are telephone-based (30%–64%) [12–14], are carried out through curbside discussion (19%) [13], or are conducted by e-mail (5%) [12]. The value of informal consultations for quality of care and outcome has been a neglected topic, however.

The objective of this study was to investigate the impact of informal IDS consultation on disease progression, outcome, and mortality regarding SAB in Finland, and to compare it to cases with formal bedside consultation or no consultation at all. Low prevalence of methicillin-resistant *S. aureus* (MRSA) enabled us to avoid the impact of differences in empirical antibiotic choice and to compare types of IDS consultation in a patient population in which each patient received appropriate antimicrobial treatment from the onset of SAB.

## METHODS

### Study Population

All adult patients (N = 342) with at least 1 positive blood culture for *S. aureus* from Helsinki University Central Hospital in Finland were retrospectively identified during 2000–2002 and 2006–2007. *Staphylococcus aureus* isolates and patients were matched by using the unique personal number given to all residents of Finland. Patient data came from both electronic (2006–2007) and written (2000–2002) hospital archives. For 7 patients, written documents were lacking, leading to their exclusion. Some patients from the 2000–2002 study period were included in our previous study [17]. We included 2 time periods to exclude the effect of unidentified temporary differences in treatment practices, personnel, or other factors difficult to control for. By including both electronic and paper records, the possible disadvantage with either information storage pattern was taken into account. Bacteremia due to MRSA was omitted (5 cases during 2000–2002, and no cases during 2006–2007). We followed patient records for 90 days, documenting age, sex, underlying diseases, acquisition of SAB, and antibiotic treatment. In addition, we had hospital duration, surgery, and infection-focus documentation verified by radiological, bacteriological, or pathological investigations or solely by clinical suspicion, and recorded time to defervescence

(axillary temperature <37.5°C) and radiological and laboratory findings.

### Definitions

The modified Duke criteria provided a definition of endocarditis [18]. Severe sepsis was defined as sepsis in combination with hypotension, hypoperfusion, or organ failure [19]. Prognosis or severity of underlying diseases provided the classifications healthy, nonfatal, or ultimately or rapidly fatal, according to McCabe and Jackson [20]. SAB was regarded as healthcare associated when the positive blood culture for *S. aureus* was obtained  $\geq 48$  hours after hospital admission, or when the patient had remained in a long-term care facility or undergone hemodialysis within the preceding 2 months. Deep infection foci included meningitis, mediastinitis, pneumonia, endocarditis, purulent arthritis, osteomyelitis, deep-seated abscess, and any foreign-body infection.

IDS consultations within 1 week after the first positive blood culture for *S. aureus* were grouped into 3 categories: no consultation, informal consultation, and formal bedside consultation.

Bedside consultation was recorded if the IDS had written comments into the patient record regarding status based on physical investigation and a careful review of patient records including advice on treatment such as length and choice of antibiotic treatment, need for radiological examination, and removal of any infected foreign device or eradication of possible infection focus. Informal telephone IDS consultation was recorded when the treating physician documented into the patient records the directives given by the IDS and the name of the IDS. When data on IDS consultation were lacking, the case was categorized as no consultation. Length of antibiotic therapy was considered proper when administered intravenously for at least 28 days for a deep infection focus and 14 days in the absence of any deep infection.

### Outcome

Primary outcome was mortality rate at 28 and 90 days. Secondary outcome measures were the number of deep infection foci, time to defervescence, inadequate antibiotic therapy, duration of hospitalization, and relapse of SAB within 90 days.

### Statistical Analysis

Pearson  $\chi^2$  test was used to compare categorical variables, and Student *t* test was used for noncategorical variables. Odds ratios (ORs) with 95% confidence intervals (CIs) were calculated. Univariate factors with  $P < .1$  were entered into Cox regression model (proportional hazards regression), which investigates the impact of several univariate factors upon the time (days) a fatal outcome (death) occurs. Thus, Cox regression is used to estimate factors predicting 90-day mortality. Multinomial logistic regression allowed comparison of

**Table 1. Patient Characteristics, Radiological Examinations, Infection Foci, and Mortality of 342 Patients With *Staphylococcus aureus* Bacteremia According to Type of Infectious Disease Specialist Consultation**

|                                                | Bedside Consultation (n = 245) <sup>a</sup> | Telephone Consultation (n = 62) <sup>a</sup> | No Consultation (n = 35) | Bedside vs Telephone Consultation |         | Bedside vs No Consultation |         |
|------------------------------------------------|---------------------------------------------|----------------------------------------------|--------------------------|-----------------------------------|---------|----------------------------|---------|
|                                                |                                             |                                              |                          | OR (95% CI)                       | P Value | OR (95% CI)                | P Value |
| Male sex                                       | 160 (66)                                    | 38 (61)                                      | 21 (60)                  | 1.19 (.67–2.11)                   | .56     | 1.26 (.61–2.59)            | .54     |
| Age, y, mean ± SD                              | 53.2 ± 17.7                                 | 54.8 ± 16.5                                  | 55.2 ± 16.6              |                                   | .53     |                            | .54     |
| Healthcare-associated bacteremia               | 141 (57)                                    | 31 (50)                                      | 22 (63)                  | 1.36 (.78–2.37)                   | .29     | 0.80 (.39–1.66)            | .55     |
| Underlying disease classification <sup>b</sup> |                                             |                                              |                          |                                   |         |                            |         |
| Healthy or nonfatal                            | 174 (71)                                    | 36 (58)                                      | 17 (49)                  | 1.77 (.99–3.15)                   | .05     | 2.59 (1.27–5.32)           | .008    |
| Ultimately or rapidly fatal                    | 71 (29)                                     | 26 (42)                                      | 18 (51)                  | 0.57 (.32–1.00)                   | .05     | 0.39 (.19–.79)             | .008    |
| Underlying conditions                          |                                             |                                              |                          |                                   |         |                            |         |
| Diabetes                                       | 30 (12)                                     | 8 (13)                                       | 8 (23)                   | 0.94 (.41–2.17)                   | .89     | 0.47 (.19–1.13)            | .09     |
| Coronary artery disease                        | 47 (19)                                     | 13 (21)                                      | 10 (29)                  | 0.89 (.45–1.78)                   | .75     | 0.59 (.27–1.32)            | .19     |
| Chronic lung disease                           | 33 (14)                                     | 12 (19)                                      | 4 (11)                   | 0.65 (.31–1.35)                   | .24     | 1.21 (.40–3.64)            | ...     |
| Dialysis                                       | 31 (13)                                     | 6 (10)                                       | 4 (11)                   | 1.35 (.54–3.40)                   | .52     | 1.12 (.37–3.39)            | .84     |
| Corticosteroid therapy <sup>c</sup>            | 12 (5)                                      | 3 (5)                                        | 2 (6)                    | 1.01 (.28–3.72)                   | .98     | 0.85 (.18–3.98)            | .84     |
| Previous surgery <sup>d</sup>                  | 59 (24)                                     | 14 (23)                                      | 11 (31)                  | 1.09 (.56–2.11)                   | .80     | 0.69 (.32–1.49)            | .35     |
| Treatment-related factors                      |                                             |                                              |                          |                                   |         |                            |         |
| Severe sepsis <sup>e</sup>                     | 16 (7)                                      | 6 (10)                                       | 11 (31)                  | 0.65 (.24–1.74)                   | .39     | 0.15 (.06–.37)             | <.0001  |
| ICU, within 3 d                                | 52 (21)                                     | 21 (34)                                      | 7 (20)                   | 0.53 (.29–.97)                    | .037    | 0.85 (.34–2.09)            | .72     |
| ICU, within 7 d                                | 71 (29)                                     | 23 (37)                                      | 11 (31)                  | 0.69 (.39–1.24)                   | .22     | 0.85 (.39–1.84)            | .69     |
| Hospitalization, mean days ± SD                | 38.7 ± 21.7                                 | 30.6 ± 23.0                                  | 24.9 ± 24.8              |                                   | .014    |                            | .001    |
| Time to defervescence, mean days ± SD          | 6.7 ± 9.7                                   | 12.6 ± 13.4                                  | 13.4 ± 14.7              |                                   | .001    |                            | .003    |
| Radiology <sup>f</sup>                         |                                             |                                              |                          |                                   |         |                            |         |
| Transthoracic echocardiography                 | 188 (77)                                    | 44 (71)                                      | 9 (26)                   | 1.35 (.72–2.52)                   | .35     | 9.53 (4.22–21.5)           | <.0001  |
| Transesophageal echocardiography               | 27 (11)                                     | 2 (3)                                        | 1 (3)                    | 3.73 (.86–16.1)                   | .06     | 4.23 (.56–32.1)            | .13     |
| Whole-body computed tomography                 | 167 (68)                                    | 34 (55)                                      | 10 (29)                  | 1.76 (.99–3.11)                   | .049    | 5.35 (2.45–11.7)           | <.0001  |
| Leukocyte indium-111 scintigraphy              | 105 (43)                                    | 8 (13)                                       | 3 (9)                    | 5.06 (2.31–11.1)                  | <.0001  | 8.00 (2.39–26.8)           | <.0001  |
| Infection foci                                 |                                             |                                              |                          |                                   |         |                            |         |
| Any deep infection focus                       | 191 (78)                                    | 33 (53)                                      | 10 (29)                  | 3.11 (1.74–5.57)                  | <.0001  | 8.84 (4.00–19.5)           | <.0001  |
| Osteomyelitis                                  | 78 (32)                                     | 6 (10)                                       | 1 (3)                    | 4.36 (1.80–10.6)                  | <.0001  | 15.9 (2.14–118)            | <.0001  |
| Deep-seated abscesses                          | 110 (45)                                    | 10 (16)                                      | 0 (0)                    | 4.24 (2.06–8.72)                  | <.0001  | ...                        | ...     |
| Endocarditis                                   | 39 (16)                                     | 4 (7)                                        | 1 (3)                    | 2.75 (.94–7.99)                   | .055    | 6.44 (.86–48.4)            | .039    |
| Skin or soft tissue infection                  | 174 (71)                                    | 32 (52)                                      | 14 (40)                  | 2.29 (1.30–4.06)                  | .004    | 3.68 (1.77–7.63)           | <.0001  |
| Proper antibiotic therapy                      | 208 (85)                                    | 39 (63)                                      | 16 (54)                  | 2.78 (1.28–6.05)                  | .008    | 3.96 (1.47–10.6)           | .004    |
| Mortality                                      |                                             |                                              |                          |                                   |         |                            |         |
| Within 3 d                                     | 1 (0.5)                                     | 1 (2)                                        | 9 (26)                   | 0.25 (.02–4.05)                   | .29     | 0.01 (.00–.09)             | <.0001  |
| Within 7 d                                     | 2 (1)                                       | 5 (8)                                        | 9 (26)                   | 0.09 (.02–.49)                    | .001    | 0.02 (.01–.12)             | <.0001  |
| Within 28 d                                    | 12 (5)                                      | 10 (16)                                      | 12 (34)                  | 0.27 (.11–.65)                    | .002    | 0.09 (.04–.25)             | <.0001  |
| Within 90 d                                    | 23 (9)                                      | 18 (29)                                      | 16 (46)                  | 0.25 (.13–.51)                    | <.0001  | 0.12 (.06–.27)             | <.0001  |
| Relapse of bacteremia                          | 3 (1)                                       | 1 (2)                                        | 2 (6)                    | 0.76 (.08–7.39)                   | .81     | 0.21 (.03–1.27)            | .061    |

Data are No. (%) of patients unless otherwise specified.

Abbreviations: CI, confidence interval; ICU, intensive care unit; OR, odds ratio; SD, standard deviation.

<sup>a</sup> Bedside and telephone consultations received within 1 week after first positive *S. aureus* blood culture.

<sup>b</sup> Underlying diseases characterized according to [20].

<sup>c</sup> Systemic prednisone >10 mg/day or equivalent for >1 month.

<sup>d</sup> Any surgical procedure within 3 months before bacteremia onset.

<sup>e</sup> Severe sepsis at onset of bacteremia.

<sup>f</sup> Radiology and deep infection foci localized within 3 months.

telephone IDS and no consultation vs bedside IDS consultation using bedside consultation as the reference. Mortality rate and time to defervescence were calculated with the Kaplan-Meier method, with the log rank test used to compare the graphs. Analyses were performed using SPSS software, version 12.0 (SPSS Inc, Chicago, Illinois). All tests were 2-tailed, with  $P < .05$  as significant. All analyses (except Table 1) were performed by excluding cases with a fatal outcome within 3 days after onset of SAB to allow for the possibility of death before IDS consultation.

## RESULTS

### Patient Characteristics

IDS consultation was given bedside in 245 (72%) cases and by telephone conversation or by some other informal manner in 62 (18%) episodes, and 35 (10%) cases were managed without consultation (Table 1). Patients with bedside or telephone IDS consultations displayed no differences regarding sex, age, nosocomial acquisition, or underlying diseases, whereas patients without IDS consultation significantly more often had severe underlying diseases ( $P > .01$ ) (Table 1). No significant differences in the occurrence of severe sepsis appeared between bedside and telephone consultation groups, whereas patients without IDS consultation suffered from severe sepsis significantly more often than bedside IDS consultation patients

( $P < .0001$ ; Table 1). The mean time-lapse between blood culture collection and IDS consultation was 3 days for both consultations groups (data not shown).

### Antibiotic Therapy

All patients received an effective antibiotic against an *S. aureus* blood isolate starting from the day of the positive blood culture. The vast majority of patients were treated with a  $\beta$ -lactam antibiotic, with vancomycin used in only 3% of cases. Proper length of antibiotic therapy was more usual among patients with bedside consultation than with telephone consultation ( $P = .008$ ) or no consultation ( $P = .004$ ; Table 1). However, when patients who died within 3 days after SAB onset were omitted, the differences were nonsignificant (Table 2).

### Clinical Management

Bedside consultation was associated with shorter duration of fever as compared to telephone ( $P = .001$ ) or no consultation ( $P = .003$ ; Table 1, Figure 1). This occurred also when patients with fatal outcome within 3 days after SAB onset were omitted from analysis (Table 2).

Treatment in the intensive care unit (ICU) within the first 3 days after SAB onset was significantly more common among patients receiving telephone consultation than bedside consultation ( $P = .037$ ). However, no difference emerged between

**Table 2. Outcome of 331 Patients With *Staphylococcus aureus* Bacteremia According to Mode of Infectious Disease Specialist Consultation**

|                                        | Telephone Consultation (n = 61) <sup>a</sup> |                  |         | No Consultation (n = 26) |                  |         | Bedside Consultation<br>(n = 244) <sup>a</sup><br>No. (%) |
|----------------------------------------|----------------------------------------------|------------------|---------|--------------------------|------------------|---------|-----------------------------------------------------------|
|                                        | No. (%)                                      | OR (95% CI)      | P Value | No. (%)                  | OR (95% CI)      | P Value |                                                           |
| Case fatality rate                     |                                              |                  |         |                          |                  |         |                                                           |
| At 28 d                                | 9 (15)                                       | 1.16 (.19–7.09)  | .08     | 3 (12)                   | 0.58 (.04–7.69)  | .68     | 11 (5)                                                    |
| At 90 d                                | 17 (28)                                      | 7.09 (2.00–25.0) | .002    | 7 (27)                   | 5.88 (1.03–33.3) | .046    | 22 (9)                                                    |
| Deep infection focus <sup>b</sup>      | 32 (53)                                      | 0.15 (.06–.38)   | <.0001  | 8 (31)                   | 0.13 (.03–.54)   | .005    | 190 (78)                                                  |
| Defervescence in 7 d                   | 23 (38)                                      | 0.12 (.05–.29)   | <.0001  | 13 (50)                  | 0.15 (.03–.66)   | .012    | 176 (72)                                                  |
| Radiological examinations <sup>b</sup> |                                              |                  |         |                          |                  |         |                                                           |
| Leukocyte indium-111 scintigraphy      | 8 (13)                                       | 0.27 (.09–.74)   | .011    | 3 (12)                   | 0.29 (.06–1.49)  | .14     | 105 (43)                                                  |
| Transthoracic echocardiography         | 43 (71)                                      | 0.68 (.28–1.66)  | .40     | 7 (27)                   | 0.13 (.04–.48)   | .002    | 187 (77)                                                  |
| Transesophageal echocardiography       | 2 (3)                                        | 0.45 (.09–2.37)  | .35     | 1 (4)                    | 2.34 (.22–25.0)  | .48     | 27 (11)                                                   |
| Whole-body CT                          | 34 (56)                                      | 1.04 (.43–2.51)  | .93     | 9 (35)                   | 0.61 (.17–2.11)  | .43     | 167 (68)                                                  |
| Antibiotic therapy <sup>c</sup>        | 33 (54)                                      | 0.86 (.28–2.66)  | .79     | 19 (73)                  | 1.98 (.42–9.35)  | .39     | 66 (27)                                                   |
| Short hospitalization <sup>c</sup>     | 29 (48)                                      | 1.29 (.45–3.69)  | .64     | 12 (46)                  | 1.04 (.25–4.35)  | .96     | 65 (27)                                                   |

Those with telephone and no infectious disease consultation were compared to patients with bedside consultation with an infectious disease specialist by means of multinomial logistic regression analysis. Patients who died during the first 3 days after positive blood culture were excluded (n = 1 for telephone and 1 for bedside consultation and 9 for no consultation).

Abbreviations: CI, confidence interval; CT, computed tomography; OR, odds ratio.

<sup>a</sup> Bedside and telephone consultations occurred within 1 week.

<sup>b</sup> Radiology and deep infection foci localized within 3 months.

<sup>c</sup> Antibiotic therapy and hospitalization <28 days.

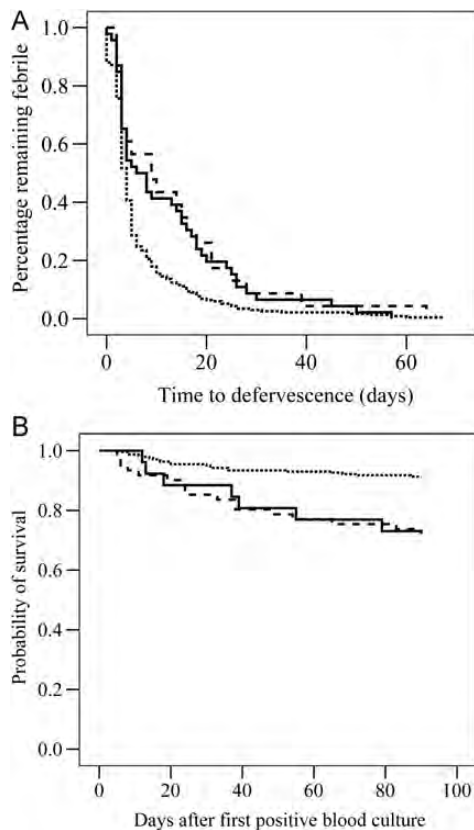

**Figure 1.** A, Kaplan-Meier analysis for time to defervescence (days) in 341 patients with *Staphylococcus aureus* bacteremia according to infectious disease specialist consultation. The dotted line represents bedside consultation within 1 week ( $n=245$ ), the solid line represents telephone consultation within 1 week ( $n=62$ ), and the dashed line represents no consultation within 1 week ( $n=35$ ). Log rank test (bedside vs telephone consultation or no consultation),  $P=.001$ . B, Kaplan-Meier analysis for 90-day survival in 331 patients with *Staphylococcus aureus* bacteremia according to type of infectious disease specialist consultation. The dotted line represents bedside consultation within 1 week ( $n=245$ ), the solid line represents telephone consultation within 1 week ( $n=62$ ), and the dashed line represents no consultation within 1 week ( $n=35$ ). Log rank test (bedside vs telephone consultation or no consultation),  $P<.0001$ . Patients who died during the first 3 days of bacteremia onset ( $n=11$ ) were excluded.

groups in proportions of patients with ICU treatment administered in the first week ( $P=.22$ ; Table 1). Mean duration of hospitalization in the bedside IDS consultation group ( $38.7 \pm 21.7$  days) was significantly longer than in the telephone consultation ( $30.6 \pm 23.0$  days;  $P=.014$ ) or no consultation groups ( $24.9 \pm 24.8$  days ( $P=.001$ ; Table 1).

### Radiological Diagnostics

No differences appeared in the use of transthoracic or transesophageal echocardiography between the telephone and bedside IDS consultation groups. Whole-body computed tomography was less frequent in the telephone IDS consultation

( $P=.049$ ) or no consultation groups ( $P=.0001$ ) than in the bedside IDS consultation group. Leukocyte indium-111 scintigraphy was more often received by bedside consultation patients than by the other groups ( $P<.0001$ ; Table 1). Again, when adjusted for early (3-day) mortality, only leukocyte indium-111 scintigraphy was given significantly less often to telephone-consulted patients than to those with bedside consultation ( $P=.011$ ; Table 2).

### Infection Foci

Patients with bedside consultation more often (78%) had a deep infection focus identified than patients with telephone (53%;  $P<.0001$ ) or with no consultation (29%;  $P<.0001$ ), with the difference emerging in all types of foci (Table 1). As compared to bedside consultation, the OR for identifying a deep infection focus was only 0.15 (95% CI, .06–.38,  $P<.0001$ ) in telephone consultation and 0.13 (95% CI, .03–.54,  $P=.005$ ) if no IDS consultation was made (Table 2).

### Outcome

Mortality within the first 3 days did not differ between the patients who received bedside or telephone consultation, whereas at 7 days ( $P=.001$ ), 28 days ( $P=.001$ ), and 90 days ( $P<.0001$ ), mortality was significantly lower among patients with bedside consultation (Table 1). One-fourth of patients without IDS consultation had already died within the first 3 days after SAB onset and this group had higher mortality than bedside-consulted patients throughout the 90-day study period ( $P<.0001$ ; Table 1). After excluding the deaths during the first 3 days, patients with telephone or no IDS consultation differed from bedside consultation patients in 90-day mortality but not in 28-day mortality (Table 2, Figure 1B).

Factors associated with fatal outcome were analyzed by the Cox regression method (Table 3). When all prognostic determinants were taken into account, telephone consultation ( $P=.01$ ), no IDS consultation ( $P=.002$ ), pneumonia ( $P=.001$ ), ICU within 3 days of SAB onset ( $P=.012$ ), and corticosteroid therapy ( $P=.01$ ) were associated with fatal outcome in multivariate analysis. The OR for mortality for telephone-consultation patients was 2.31 (95% CI, 1.22–4.38) as compared with bedside consultation (Table 3). One hundred five (31%) patients were treated in the ICU during the first 7 days after SAB onset. Prognostic factors were analyzed separately in ICU-treated patients by comparing the fatal cases to those who survived (Table 4). Factors associated with survival were bedside consultation ( $P<.0001$ ), McCabe healthy or nonfatal disease ( $P=.003$ ), and whole-body computed tomography done ( $P=.027$ ), whereas telephone ( $P=.001$ ) or no IDS consultation ( $P=.008$ ) and McCabe ultimately or rapidly fatal disease ( $P=.003$ ) were associated with higher mortality in ICU-treated patients as well.

**Table 3. Cox Regression Model (Proportional Hazards Regression) for Prognostic Factors of 90-Day Mortality in 331 Patients With *Staphylococcus aureus* Bacteremia**

|                                                     | Univariate Analysis |         | Multivariate Analysis |         |
|-----------------------------------------------------|---------------------|---------|-----------------------|---------|
|                                                     | OR (95% CI)         | P Value | OR (95% CI)           | P Value |
| Positive prognostic impact:                         |                     |         |                       |         |
| Healthy or nonfatal underlying disease <sup>a</sup> | 0.11 (.05–.22)      | <.0001  | 0.18 (.09–.35)        | <.0001  |
| Leukocyte indium-111 scintigraphy                   | 0.41 (.19–.87)      | .018    | 0.40 (.19–.87)        | .021    |
| Whole-body CT                                       | 0.43 (.23–.80)      | .007    | 0.49 (.26–.90)        | .022    |
| Bedside IDS consultation within 1 wk                | 0.26 (.14–.49)      | <.0001  |                       |         |
| Transthoracic echocardiography                      | 0.57 (.29–1.08)     | .082    |                       |         |
| Transesophageal echocardiography                    | 0.43 (.09–1.86)     | .24     |                       |         |
| Negative prognostic impact                          |                     |         |                       |         |
| Pneumonia                                           | 2.31 (1.23–4.33)    | .008    | 2.74 (1.49–5.05)      | .001    |
| ICU within 3 d                                      | 1.96 (1.00–3.83)    | .046    | 2.28 (1.19–4.15)      | .012    |
| Corticosteroid therapy <sup>b</sup>                 | 5.48 (1.93–15.6)    | <.0001  | 2.98 (1.29–6.85)      | .01     |
| Telephone IDS within 1 wk                           | 3.21 (1.63–6.33)    | <.0001  | 2.31 (1.22–4.38)      | .01     |
| No IDS consultation within 1 wk                     | 2.51 (.99–6.37)     | .045    | 3.56 (1.59–7.94)      | .002    |
| Ultimately or rapidly fatal disease <sup>a</sup>    | 9.24 (4.46–19.1)    | <.0001  |                       |         |
| Immunosuppressive therapy                           | 3.00 (1.44–6.29)    | .002    |                       |         |
| Nonhematologic malignancy                           | 3.58 (1.61–7.97)    | .001    |                       |         |
| Severe sepsis at onset of bacteremia                | 1.62 (.58–4.54)     | .36     |                       |         |
| Endocarditis                                        | 1.50 (.65–3.49)     | .34     |                       |         |

Data from patients who died during the first 3 days after positive blood culture were excluded.

Abbreviations: CI, confidence interval; CT, computed tomography; ICU, intensive care unit; IDS, infectious disease specialist; OR, odds ratio.

<sup>a</sup> Underlying diseases characterized according to [20].

<sup>b</sup> Systemic prednisone >10 mg/day or equivalent for >1 month.

## DISCUSSION

Our main finding was the significantly poorer outcome of SAB patients with telephone consultation as compared with bedside consultation. Patients treated by telephone consultation had >2-fold higher odds ratio of fatal outcome as compared to patients treated with bedside consultation even when the prognostic factors were adjusted for. Patients with telephone consultation also less frequently received the proper length of antibiotic treatment, and had shorter hospitalization and longer duration of fever. Radiological investigations were performed less often and fewer deep infection foci were localized in telephone consultation patients than in those with bedside consultation. A clear explanation for the poorer outcome of patients with telephone IDS did not emerge from their underlying conditions or the severity of their SAB.

SAB outcome is worse if proper antibiotic therapy is delayed [21]. MRSA is associated with both poor prognosis and delayed effective antibiotic therapy [2, 4, 22, 23]. We had no MRSA cases, and all patients had effective antibiotic therapy from the day of the first positive blood culture. The prevalence of MRSA in invasive infections in Finland has

remained low, near 3% [24]. Furthermore, only 3% of our patients were treated with vancomycin, which is associated with higher persistence and recurrence of SAB than with staphylococcal penicillin cloxacillin [25]. We could, therefore, analyze the impact of IDS consultation without bias from differences in the antibiotic selection made before any IDS consultation was possible.

Retrospective analyses reflect real clinical situations but carry the possibility for many kinds of bias. Differences in patient groups have affected our results. Patients with no IDS consultation had more severe underlying diseases and more often had severe sepsis than did those with bedside consultation. This has most probably resulted in a high mortality (26%) within the first 3 days after SAB onset.

We made various attempts to control reasons for the difference in the outcome between bedside and telephone consultations. Factors associated with poor prognosis were identifiable, and several of those previously reported were also evident in our patient material, such as pneumonia [2, 26, 27], ICU treatment [6, 8], and corticosteroid therapy (>10 mg/day for >1 month) [4]. After controlling for all these factors, telephone consultation was still shown to be a significant prognostic

**Table 4. Comparison of Fatalities and Surviving Patients With *Staphylococcus aureus* Bacteremia Treated in an Intensive Care Unit Within the First 7 Days of Bacteremia Onset**

|                                     | Died <sup>a</sup> (n = 24) | Survived (n = 81) | OR (95% CI)      | P Value |
|-------------------------------------|----------------------------|-------------------|------------------|---------|
| Age >60 y                           | 9 (38)                     | 34 (42)           | 0.83 (.33–2.12)  | .69     |
| Underlying diseases <sup>b</sup>    |                            |                   |                  |         |
| Healthy or nonfatal disease         | 10 (42)                    | 60 (74)           | 0.25 (.09–.65)   | .003    |
| Ultimately or rapidly fatal disease | 14 (58)                    | 21 (26)           | 4.00 (1.55–10.3) | .003    |
| IDS consultation <sup>b</sup>       |                            |                   |                  |         |
| Bedside <sup>c</sup>                | 7 (29)                     | 64 (79)           | 0.11 (.04–.31)   | <.0001  |
| Telephone <sup>c</sup>              | 11 (46)                    | 12 (15)           | 4.87 (1.77–13.4) | .001    |
| No IDS <sup>c</sup>                 | 6 (25)                     | 5 (6)             | 5.07 (1.39–18.5) | .008    |
| Radiology                           |                            |                   |                  |         |
| Transthoracic echocardiography      | 18 (75)                    | 71 (88)           | 0.42 (.14–1.32)  | .13     |
| Transesophageal echocardiography    | 2 (8)                      | 17 (21)           | 0.34 (.07–1.60)  | .16     |
| Whole-body CT                       | 10 (42)                    | 54 (67)           | 0.36 (.14–.91)   | .027    |
| Leukocyte indium-111 scintigraphy   | 6 (25)                     | 29 (36)           | 0.59 (.21–1.67)  | .32     |
| Deep infection focus                | 18 (75)                    | 63 (78)           | 0.86 (.29–2.48)  | .86     |
| Defervescence within 7 d            | 8 (33)                     | 45 (56)           | 0.51 (.18–1.49)  | .22     |

Intensive care unit treatment was given to 105 of 342 patients. Data are No. (%) unless otherwise specified. Pearson  $\chi^2$  test (*P* value) was used to compare the categorical variables.

Abbreviations: CI, confidence interval; CT, computed tomography; IDS, infectious disease specialist consultation within the first week; OR, odds ratio.

<sup>a</sup> Mortality during 90 days.

<sup>b</sup> Underlying diseases characterized according to [20].

<sup>c</sup> Bedside and telephone consultation or no consultation during the first week.

marker for fatal outcome, with an OR of 2.31 (95% CI, 1.22–4.38) in multivariate analysis.

ICU treatment was more common during the first 3 days among patients with telephone consultation as compared to patients with bedside consultation. This could have had an impact on higher mortality in the telephone consultation group as compared with the bedside consultation group, although no difference in ICU treatment during the first week was seen between these groups. Patients who needed ICU treatment during the first 3 days had significantly more often factors associated to higher mortality such as acute congestive heart failure (OR, 5.94; 95% CI, 2.60–13.5; *P* < .000) and severe sepsis at onset of bacteremia (OR, 10.2; 95% CI, 4.26–24.5; *P* < .000) as compared to patients without need for ICU treatment (data not shown). We attempted to control this by analyzing only patients treated in the ICU by survival rate and found that telephone consultation was one of the most important prognostic markers for fatal outcome, with an OR of 4.87 (95% CI, 1.77–13.4; *P* = .001).

IDS consultation has been reported to lead to increased localization of metastatic foci and endocarditis [1, 7–9], to improve proper antibiotic selection [4–7], and to help make antibiotic duration more appropriate [4, 6, 8, 9], with longer mean duration of therapy [5, 7]. In accordance with this, proper antibiotic therapy was more common and duration of hospitalization longer after bedside consultation. However,

when adjusted for various prognostic factors in multinomial logistic regression analysis, no differences then existed in the length of proper antibiotic treatment or duration of hospitalization. We defined the proper length of antibiotic therapy based on deep infection focus localization. As telephone IDS patients were less thoroughly examined radiologically and thus had fewer deep foci localized, it is possible that among these patients, 14 days of antibiotic therapy has been interpreted as correct, although it is possible that unlocalized deep foci would have required longer therapy duration. This suggests that effective localization of deep infection foci leading to longer intravenous antibiotic therapy could be one important factor behind the better outcome for bedside consultation.

IDS consultation has been reported to result in more radiological examinations and echocardiography as well as more frequent bone scans [6–9]. In the present study, we found, somewhat surprisingly, that leukocyte indium-111 scintigraphy was an indicator of better prognosis, a finding that, to our knowledge, has not yet been reported in SAB. Indium-111 scintigraphy is not a common examination in bacteremia, but it was made to significantly more patients in the bedside consultation group as compared to the other patient groups. Therefore, the association between better prognosis and indium-111 scintigraphy needs further validation; it might be solely due to linkage to bedside consultation group.

We could link all *S. aureus* blood isolations to patient data. Records for only 7 patients were not available for analysis. Only 10% of patients were treated without any mention of IDS consultation in patient records, which ensures that the number of potentially missed telephone consultations was remarkably low. Telephone consultations during office hours were directed to the same named consultant who made the bedside consultations. Outside office hours and during weekends, telephone consultations were directed to the infectious disease specialist or resident on call. Unfortunately, we could not retrieve the time point of consultation from the patient records. This is the most likely explanation for the high proportion of telephone consultations among ICU patients and may at least in part explain the poorer outcome of telephone-consulted patients as compared to bedside-consulted patients. Insufficient information provided or important information not provided has been linked to informal or curbside consultations previously [12]. Lack of valid information for the consultant and poor adherence to advice given by him/her may be other reasons explaining the poorer outcome in telephone as compared to bedside consultation. A formal bedside consultation after every telephone consultation in SAB might be advisable.

We included 2 time periods for data collection to exclude the effect of unidentified temporary differences in treatment practices, personnel, or other factors difficult to control for. During these study periods, all patients with SAB from Helsinki University Central Hospital were included in the analyses. In addition, the 2 different study periods were considered necessary because a major percentage of patients during the first study period were included in our published trial [17]. No significant difference appeared in the results analyzed separately during the study periods (data not shown). During the second study period, we had electronic patient records, which made it possible to retrieve the patient records and laboratory results during the telephone consultation. We could not record how often electronic data were retrieved; further studies on the benefits of electronic patient records in the consultation process may be necessary.

In conclusion, our data indicate that, overall, informal or telephone IDS consultation in SAB is associated to poorer outcome compared with bedside or formal IDS consultation. Our data encourage evaluation of IDS consultation processes in SAB and suggest that it might be reasonable to complete telephone consultations by a formal bedside consultation or thorough patient record retrieval.

## Notes

**Financial support.** E. F. has been funded by a major grant given by The Medical Society of Finland.

**Potential conflicts of interest.** All authors: No reported conflicts.

All authors have submitted the ICMJE Form for Disclosure of Potential Conflicts of Interest. Conflicts that the editors consider relevant to the content of the manuscript have been disclosed.

## References

1. Fowler VG Jr, Sanders LL, Sexton DJ, et al. Outcome of *Staphylococcus aureus* bacteremia according to compliance with recommendations of infectious diseases specialists: experience with 244 patients. *Clin Infect Dis* **1998**; 27:478–86.
2. Conterno LO, Wey SB, Castelo A. Risk factors for mortality in *Staphylococcus aureus* bacteremia. *Infect Control Hosp Epidemiol* **1998**; 19:32–7.
3. Fowler VG Jr, Sanders LL, Kong LK, et al. Infective endocarditis due to *Staphylococcus aureus*: 59 prospectively identified cases with follow-up. *Clin Infect Dis* **1999**; 28:106–14.
4. Choi SH, Cho SY, Park JH, Chung JW. Impact of infectious-disease specialist consultations on outcomes of *Staphylococcus aureus* bacteremia in a hospital with a low volume of patients with *S. aureus* bacteremia. *J Infect* **2011**; 62:181–5.
5. Lahey T, Shah R, Gittzus J, Schwartzman J, Kirkland K. Infectious disease consultation lowers mortality from *Staphylococcus aureus* bacteremia. *Medicine* **2009**; 88:263–7.
6. Honda H, Krauss MJ, Jones JC, Olsen MA, Warren DK. The value of infectious diseases consultation in *Staphylococcus aureus* bacteremia. *Am J Med* **2010**; 123:631–7.
7. Jenkins TC, Price CS, Sabel AL, Mehler PS, Burman WJ. Impact of routine infectious diseases service consultation on the evaluation, management, and outcomes of *Staphylococcus aureus* bacteremia. *Clin Infect Dis* **2008**; 46:1000–8.
8. Rieg S, Peyerl-Hoffmann G, de With K, et al. Mortality of *S. aureus* bacteremia and infectious diseases specialist consultation—a study of 521 patients in Germany. *J Infect* **2009**; 59:232–9.
9. Nagao M, Iinuma Y, Saito T, et al. Close cooperation between infectious disease physicians and attending physicians results in better outcomes for patients with *Staphylococcus aureus* bacteraemia. *Clin Microbiol Infect* **2009**; 16:1783–8.
10. Sellier E, Pavese P, Gennai S, Stahl JP, Labare`re J, Francois P. Factors and outcomes associated with physicians' adherence to recommendations of infectious disease consultations for inpatients. *J Antimicrob Chemother* **2010**; 65:156–62.
11. Botelho-Nevers E, Thuny F, Casalta JP, et al. Dramatic reduction in infective endocarditis-related mortality with a management-based approach. *Arch Intern Med* **2009**; 169:1290–8.
12. Kuo D, Gifford DR, Stewin MD. Curbside consultations practices and attitudes among primary care physicians and medical specialists. *JAMA* **1998**; 280:905–9.
13. Yinnon AM. Whither infectious diseases consultations? Analysis of 14,005 consultations from a 5-year period. *Clin Infect Dis* **2001**; 15:1661–7.
14. Leblebicioglu H, Akbulut A, Ulusory M, et al. Informal consultations in infectious diseases and clinical microbiology practice. *Clin Microbiol Infect* **2003**; 9:724–6.
15. Grace C, Alston WK, Ramundo M, Polish L, Kirkpatrick B, Huston C. The complexity, relative value, and financial worth of curbside consultations in an academic infectious disease unit. *Clin Infect Dis* **2010**; 51:651–5.
16. Bal G, Sellier E, Gennai S, Caillis M, François P, Pavese P. Infectious disease specialist telephone consultations requested by general practitioners. *Scand J Infect Dis* **2011**; 43:912–7.
17. Ruotsalainen E, Jarvinen A, Koivula I, et al. Levofloxacin does not decrease mortality in *Staphylococcus aureus* bacteraemia when added to the standard treatment: a prospective and randomized clinical trial of 381 patients. *J Intern Med* **2006**; 259:179–90.
18. Li JS, Sexton DJ, Mick N, et al. Proposed modifications to the Duke criteria for the diagnosis of infective endocarditis. *Clin Infect Dis* **2000**; 30:633–8.



19. Levy MM, Fink MP, Marshall JC, et al. 2001 SCCM/ESICM/ACCP/ATS/SIS International Sepsis Definitions Conference. *Crit Care Med* **2003**; 31:1250–6.
20. McCabe WR, Jackson GG. Gram-negative bacteremia. I. Etiology and ecology. *Arch Intern Med* **1962**; 110:847–53.
21. Lodise TP, McKinnon PS, Swiderski L, Rybak MJ. Outcomes analysis of delayed antibiotic treatment for hospital-acquired *Staphylococcus aureus* bacteremia. *Clin Infect Dis* **2003**; 36:1418–23.
22. Cosgrove SE, Sakoulas G, Perencevich EN, Schwaber MJ, Karchmer AWCarmeli Y. Comparison of mortality associated with methicillin-resistant and methicillin-susceptible *Staphylococcus aureus* bacteremia: a meta-analysis. *Clin Infect Dis* **2003**; 36:53–9.
23. Pfaller MA, Jones RN, Doern GV, Sader HS, Kugler KC, Beach ML. Survey of blood stream infections attributable to gram-positive cocci: frequency of occurrence and antimicrobial susceptibility of isolates collected in 1997 in the United States, Canada, and Latin America from the SENTRY Antimicrobial Surveillance Program. SENTRYParticipants Group. *Diagn Microbiol Infect Dis* **1999**; 33:283–97.
24. Finnish National Institute for Health and Welfare. Report 17/2011, page 28. <http://www.thl.fi/thl-client/pdfs/1d73f597-8188-4ff5-b33c-101d7e1c3e90>.
25. Siegman-Igra Y, Reich P, Orni-Wasserlauf R, Schwartz D, Giladi M. The role of vancomycin in the persistence or recurrence of *Staphylococcus aureus* bacteraemia. *Scand J Infect Dis* **2005**; 37:572–8.
26. Mylotte JM, Tayara A. *Staphylococcus aureus* bacteremia: predictors of 30-day mortality in a large cohort. *Clin Infect Dis* **2000**; 31:1170–4.
27. Benfield T, Espersen F, Frimodt-Moller N, et al. Increasing incidence but decreasing in-hospital mortality of adult *Staphylococcus aureus* bacteraemia between 1981 and 2000. *Clin Microbiol Infect* **2007**; 13:257–63.
